# Supplementary material
Source: PubMed Central journal article supplement (PMC10753269)

NMR 5 1 "C:\Users\solru\Google Drive\Panitch Lab\Projects\Thiolated GAG hydrogel"

#5, HA-SH Low  
MN 081721

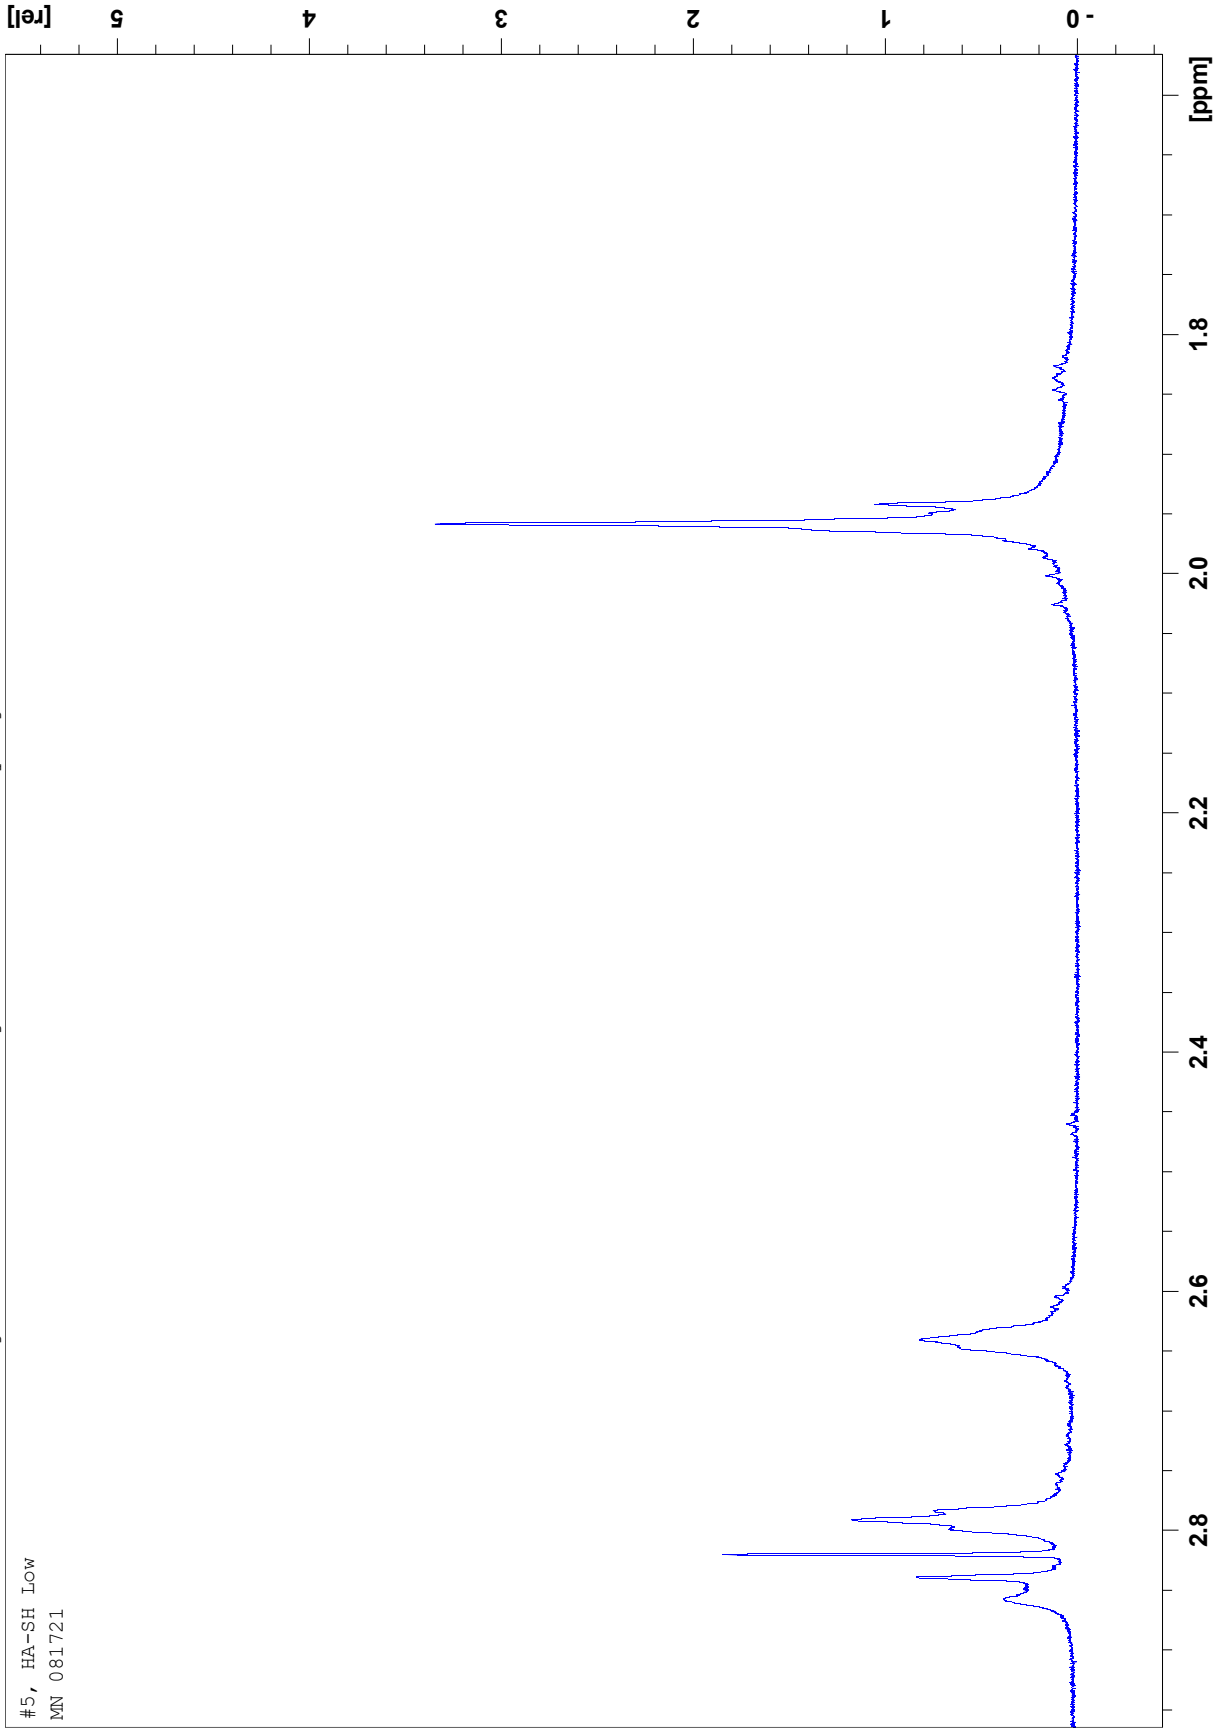

Supplement: NIHMS1771313-supplement-Sub__6.pdf [file NIHMS1771313-supplement-Sub__6.pdf]

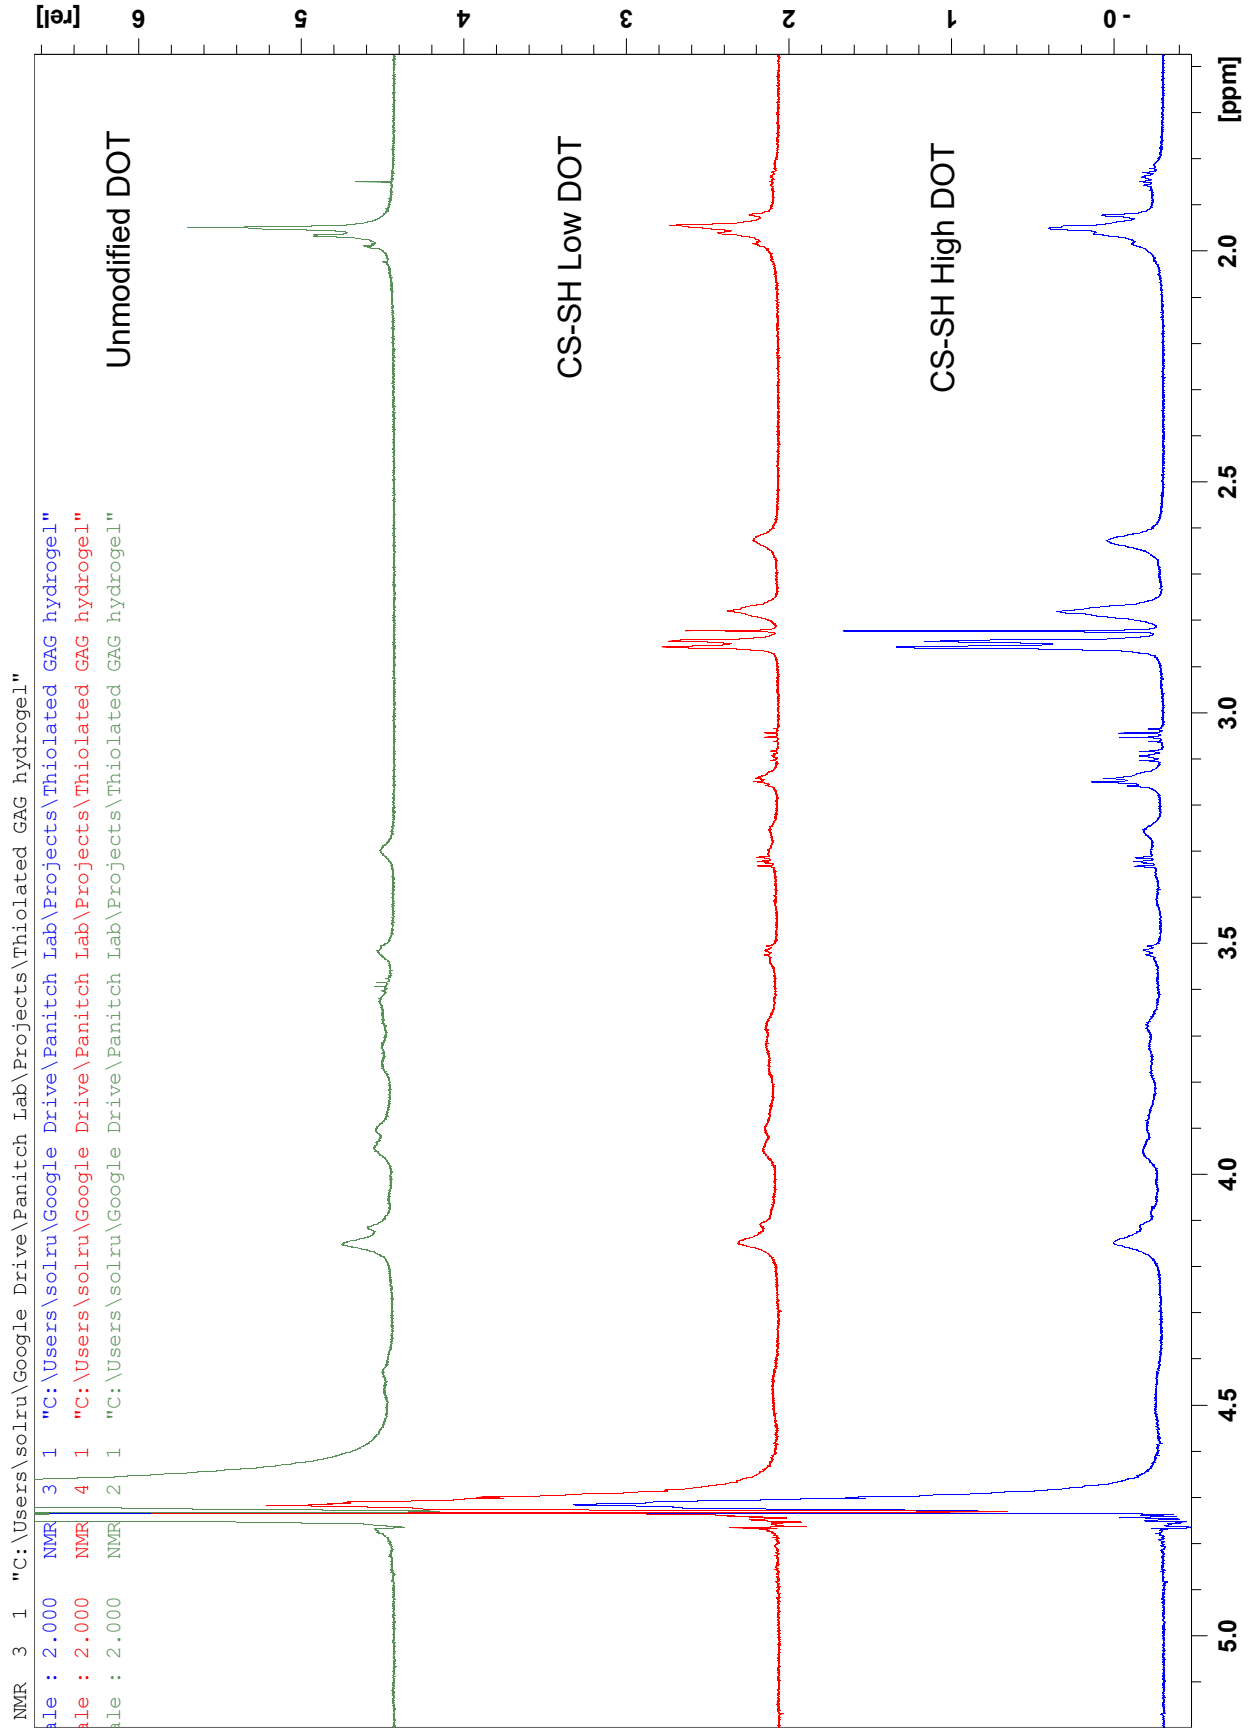

Supplement: NIHMS1771313-supplement-Sup__1.pdf [file NIHMS1771313-supplement-Sup__1.pdf]

NMR 3 1 "C:\Users\solru\Google Drive\Panitch Lab\Projects\Thiolated GAG hydrogel"

#3, CS-SH High  
MN 081721

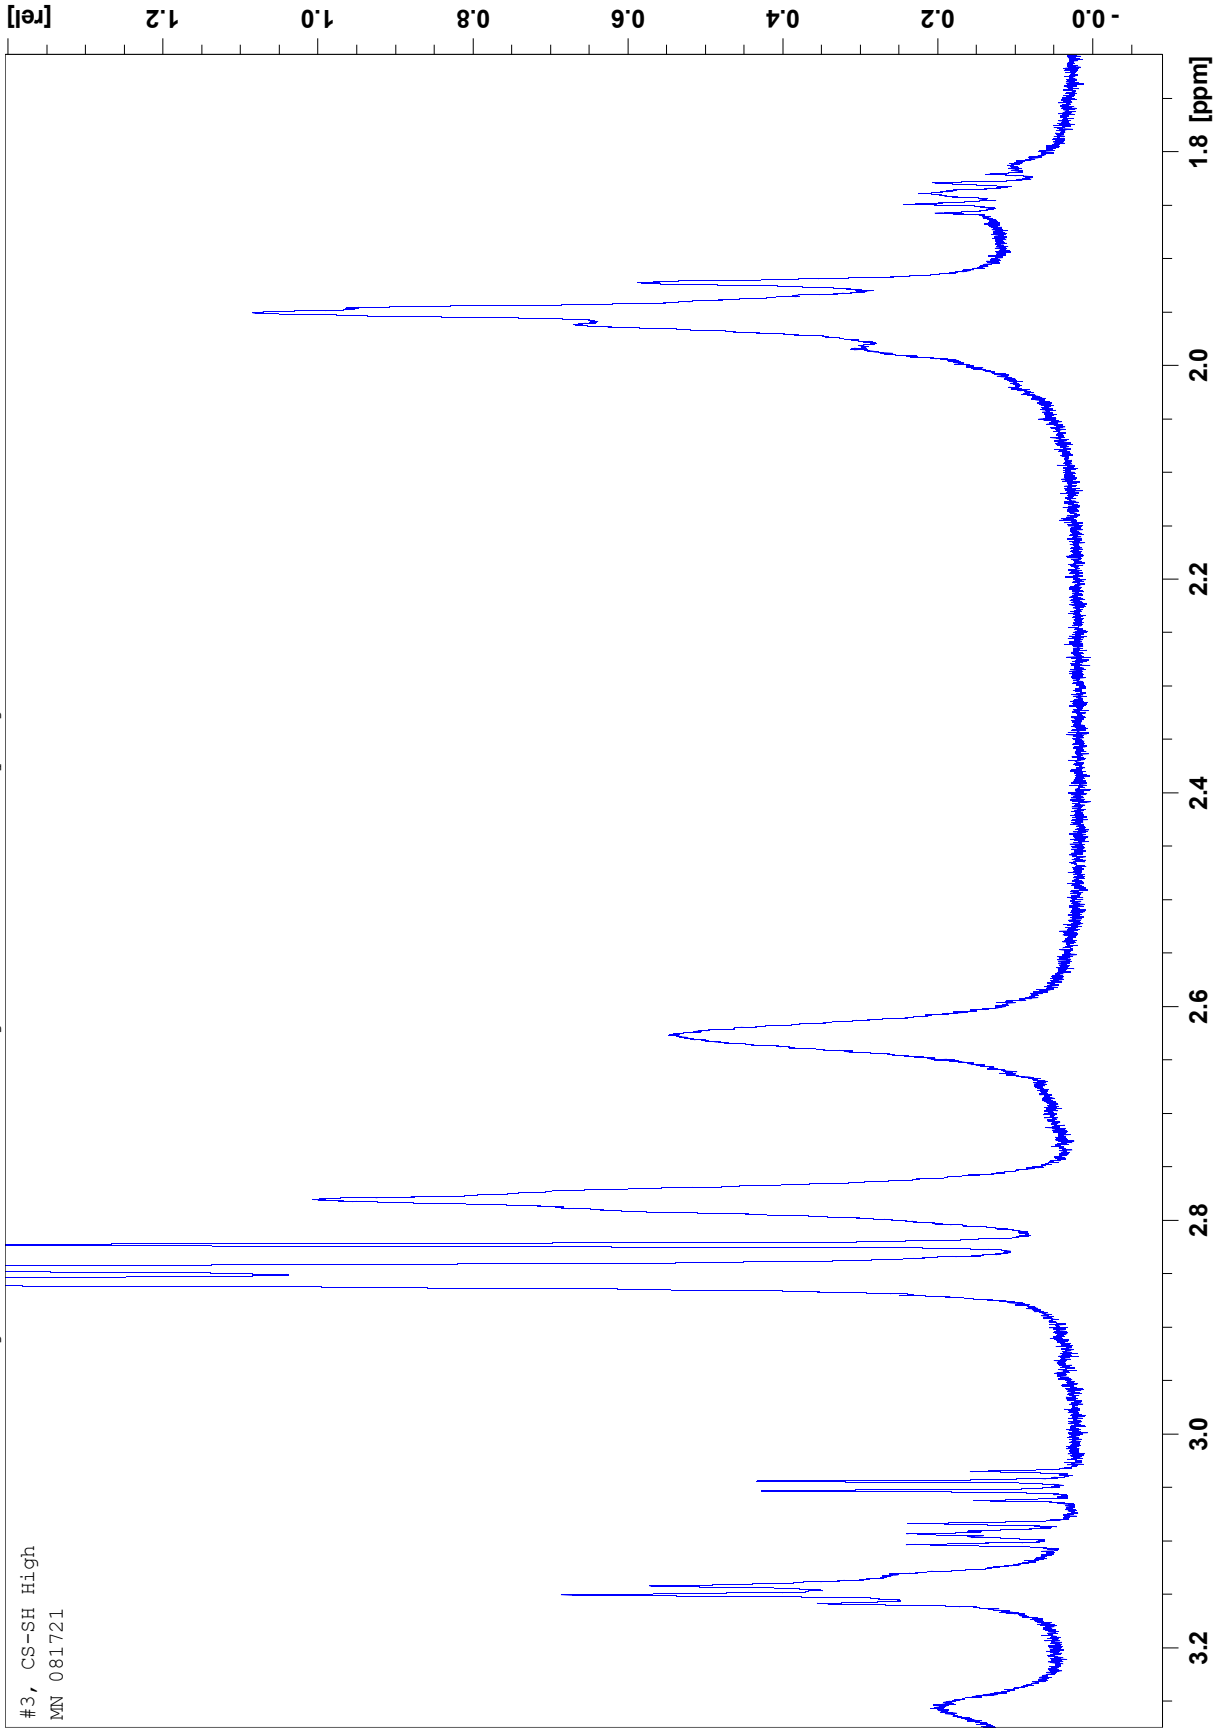

Supplement: NIHMS1771313-supplement-Sup__2.pdf [file NIHMS1771313-supplement-Sup__2.pdf]

NMR 4 1 "C:\Users\solru\Google Drive\Panitch Lab\Projects\Thiolated GAG hydrogel"

#4, CS-SH Low  
MN 081721

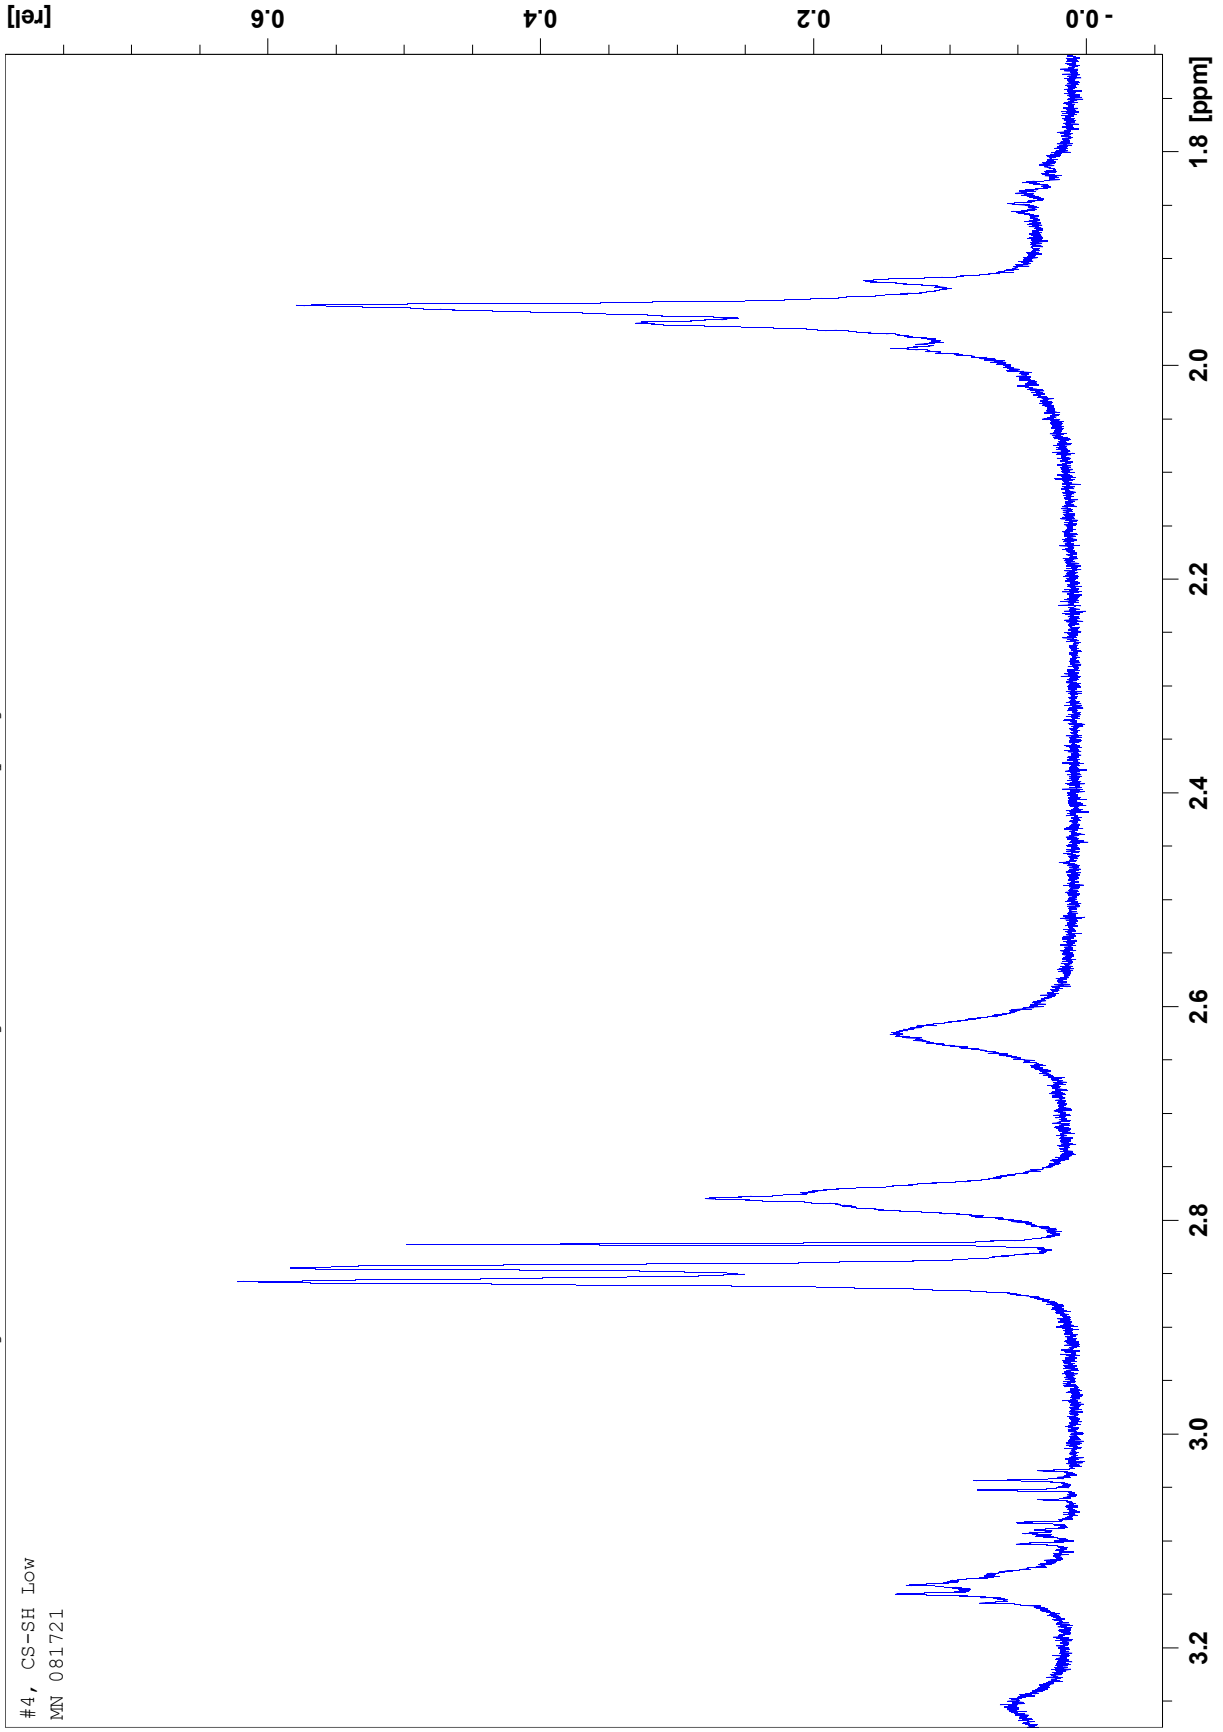

Supplement: NIHMS1771313-supplement-Sup__3.pdf [file NIHMS1771313-supplement-Sup__3.pdf]

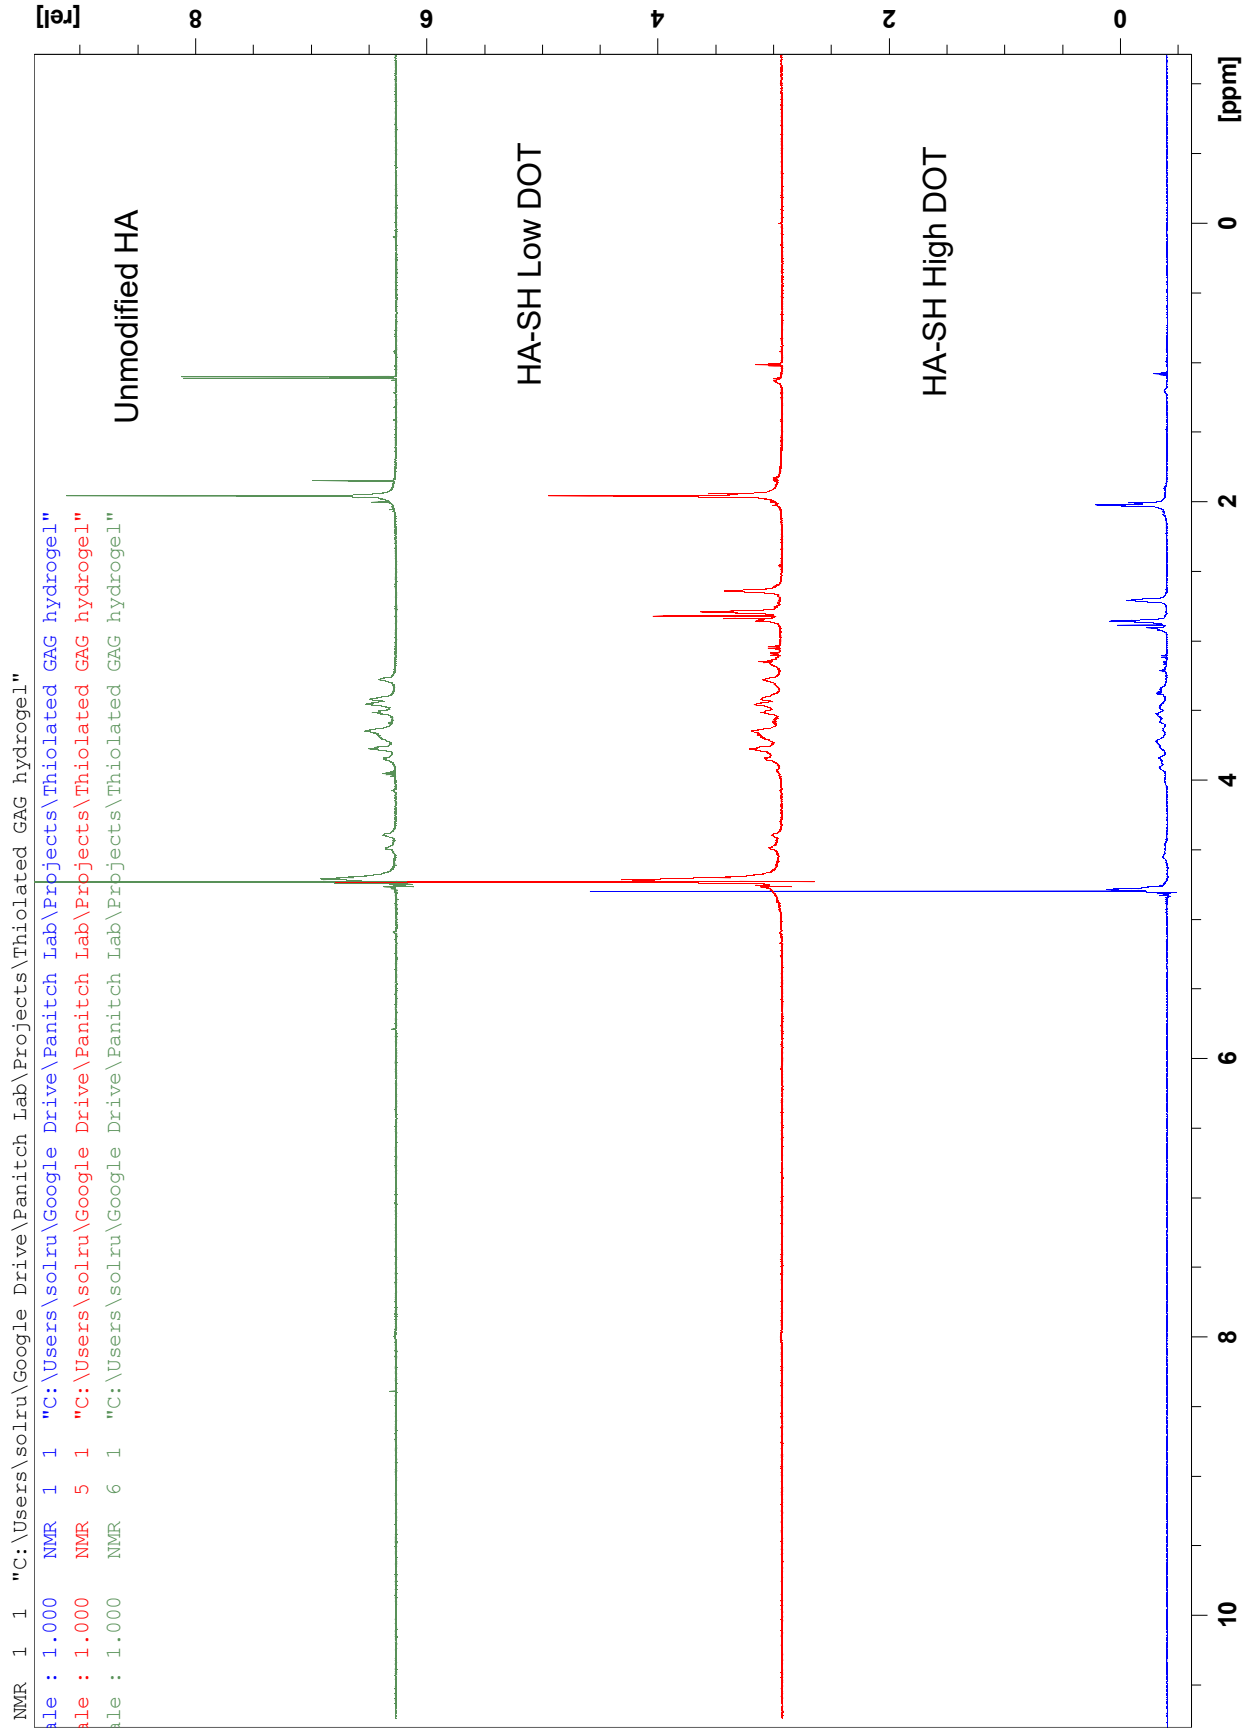

Supplement: NIHMS1771313-supplement-Sup__4.pdf [file NIHMS1771313-supplement-Sup__4.pdf]

NMR 1 1 "C:\Users\solru\Google Drive\Panitch Lab\Projects\Thiolated GAG hydrogel"

#1, HA-SH High

MN 081721

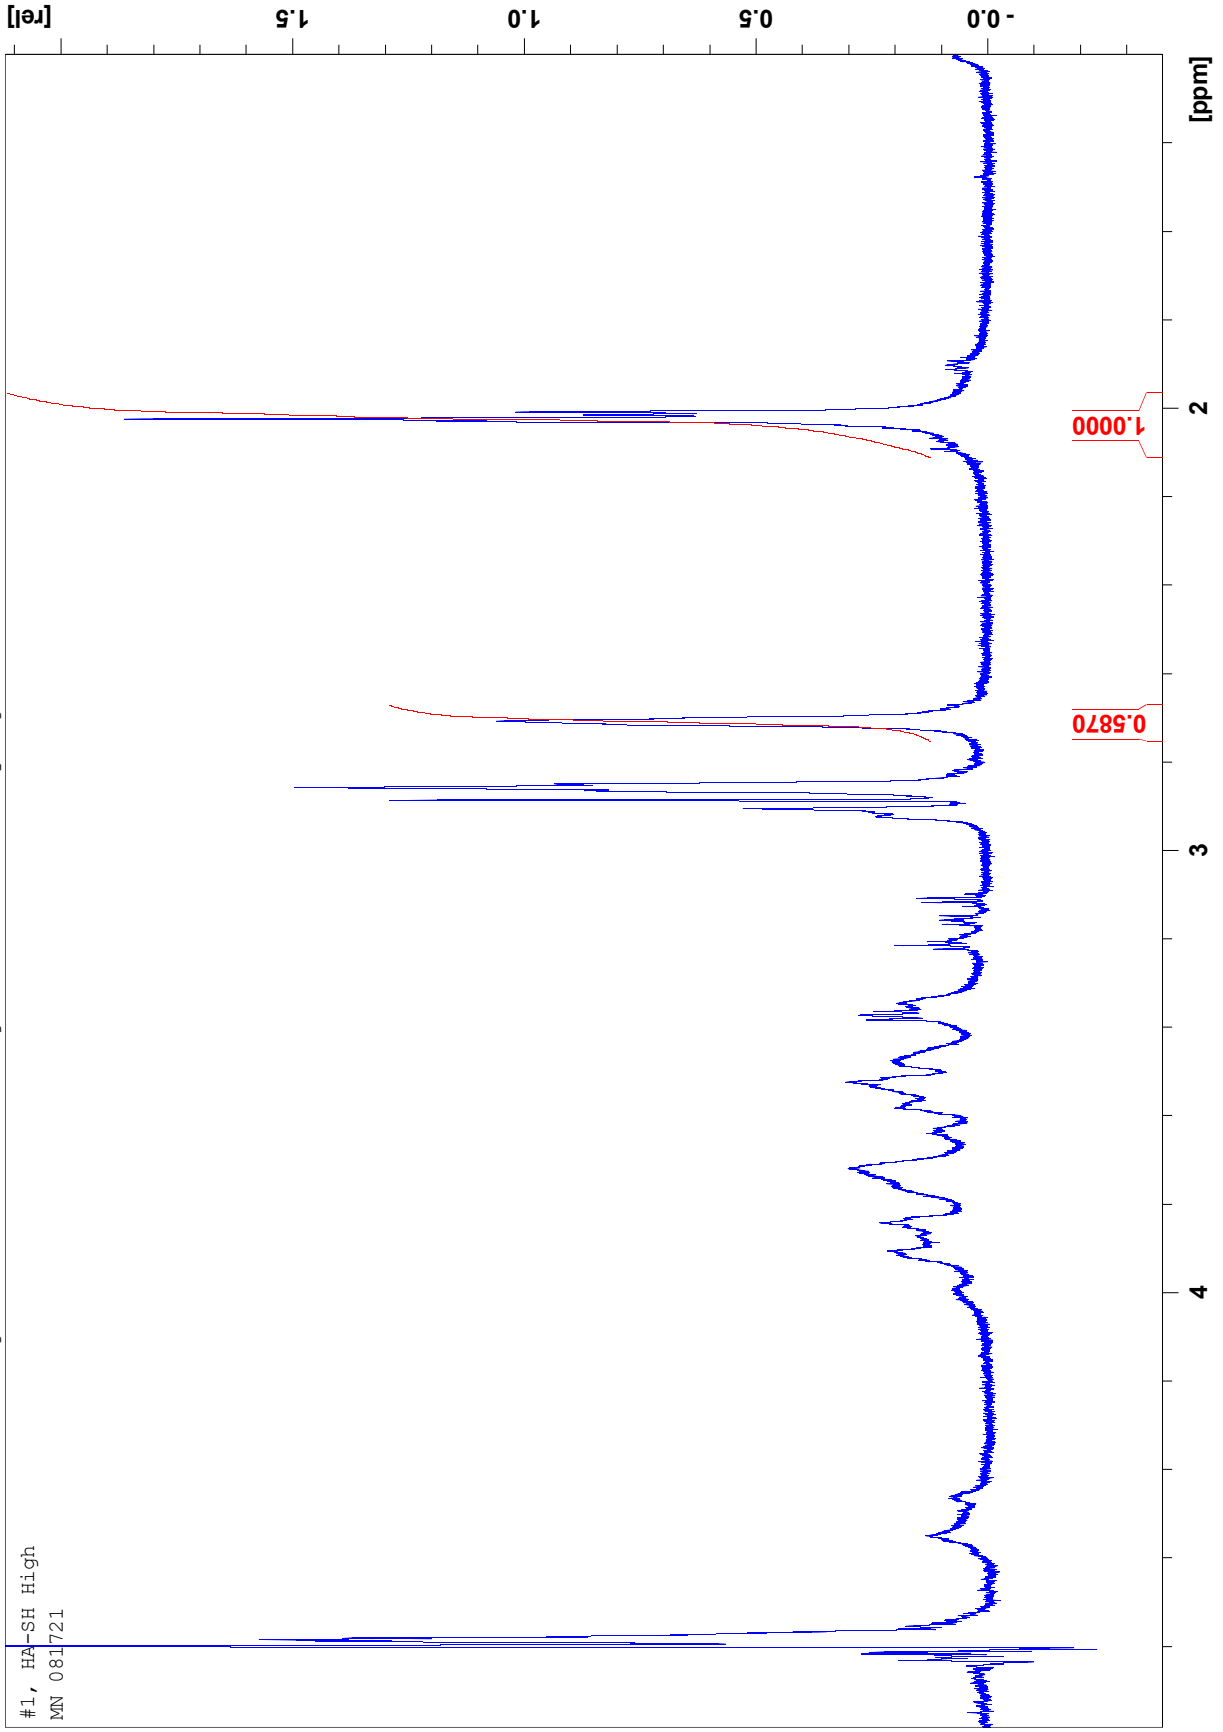

Supplement: NIHMS1771313-supplement-Sup__5.pdf [file NIHMS1771313-supplement-Sup__5.pdf]
